# Supplementary material for: Influence of a priori Information, Designs, and Undetectable Data on Individual Parameters Estimation and Prediction of Hepatitis C Treatment Outcome
Source: PubMed Central journal article supplement — CPT Pharmacometrics Syst Pharmacol. 2013 Jul 17;2(7):e56–. doi: 10.1038/psp.2013.31 (PMC3731824; doi:10.1038/psp.2013.31), 2013-07-17
Supplement: psp201331x2.pdf [file psp201331x2.pdf]

## Supplementary materials 2

Table S2. Treatment outcome prediction for a 24-week treatment for different scenarios <sup>(\*)</sup>

| <i>A priori information</i>     | <i>Design</i>                    | <i>Method</i>          | MC          | TN   | FP   | FN   | TP   |      |
|---------------------------------|----------------------------------|------------------------|-------------|------|------|------|------|------|
| <i>M<sub>true</sub></i>         | <i>D<sub>24w</sub></i>           | <i>LBA</i>             | 4.1         | 19.3 | 2.3  | 1.8  | 76.6 |      |
|                                 |                                  | <i>OMIT</i>            | 4.0         | 19.6 | 2.0  | 2.0  | 76.4 |      |
|                                 | <i>D<sub>4w</sub></i>            | <i>LBA</i>             | 5.5         | 17.9 | 3.7  | 1.8  | 76.6 |      |
|                                 |                                  | <i>OMIT</i>            | 5.6         | 18.0 | 3.6  | 2.0  | 76.4 |      |
|                                 | <i>D<sub>4w_sparse</sub></i>     | <i>LBA</i>             | 5.7         | 17.6 | 4.0  | 1.7  | 76.7 |      |
|                                 |                                  | <i>OMIT</i>            | 5.6         | 17.7 | 3.9  | 1.7  | 76.7 |      |
|                                 | <i>D<sub>4w_challenge</sub></i>  | <i>LBA</i>             | 5.5         | 17.0 | 4.6  | 0.9  | 77.5 |      |
|                                 |                                  | <i>OMIT</i>            | 5.8         | 17.0 | 4.6  | 1.2  | 77.2 |      |
|                                 | <i>M<sub>δ<sub>ε</sub></sub></i> | <i>D<sub>24w</sub></i> | <i>LBA</i>  | 3.8  | 19.7 | 1.9  | 1.9  | 76.5 |
|                                 |                                  |                        | <i>OMIT</i> | 7.6  | 19.9 | 1.7  | 5.9  | 72.5 |
|                                 |                                  | <i>D<sub>4w</sub></i>  | <i>LBA</i>  | 5.3  | 18.3 | 3.3  | 2.0  | 76.4 |
|                                 |                                  |                        | <i>OMIT</i> | 9.3  | 18.2 | 3.4  | 5.9  | 72.5 |
| <i>D<sub>4w_sparse</sub></i>    |                                  | <i>LBA</i>             | 5.7         | 17.5 | 4.1  | 1.6  | 76.8 |      |
|                                 |                                  | <i>OMIT</i>            | 27.4        | 17.7 | 3.9  | 23.5 | 54.9 |      |
| <i>D<sub>4w_challenge</sub></i> |                                  | <i>LBA</i>             | 5.7         | 16.4 | 5.2  | 0.5  | 77.9 |      |
|                                 |                                  | <i>OMIT</i>            | 74.3        | 19.1 | 2.5  | 71.5 | 6.6  |      |
| <i>M<sub>β</sub></i>            |                                  | <i>D<sub>24w</sub></i> | <i>LBA</i>  | 21.8 | 21.1 | 0.5  | 21.3 | 57.1 |
|                                 |                                  |                        | <i>OMIT</i> | 25.9 | 21.1 | 0.5  | 25.4 | 53.0 |
|                                 |                                  | <i>D<sub>4w</sub></i>  | <i>LBA</i>  | 24.3 | 21.1 | 0.5  | 23.8 | 54.6 |
|                                 |                                  |                        | <i>OMIT</i> | 25.9 | 21.1 | 0.5  | 25.4 | 53.0 |
|                                 | <i>D<sub>4w_sparse</sub></i>     | <i>LBA</i>             | 22.8        | 21.0 | 0.6  | 22.2 | 56.2 |      |
|                                 |                                  | <i>OMIT</i>            | 26.9        | 21.0 | 0.6  | 26.3 | 52.1 |      |
|                                 | <i>D<sub>4w_challenge</sub></i>  | <i>LBA</i>             | 26.1        | 19.9 | 1.7  | 24.4 | 54.0 |      |
|                                 |                                  | <i>OMIT</i>            | 26.5        | 19.9 | 1.7  | 24.8 | 53.6 |      |

<sup>(\*)</sup> obtained using different sets of *a priori* information, of designs and of methods for handling BDL data. Treatment response is predicted for a 24-week treatment. TN: percentage of uncured patients predicted to remain infected, FP: percentage of uncured patients predicted to have SVR, FN: percentage of patients having SVR predicted to remain infected, TP: percentage of cured patients predicted to have SVR. MC: percentage of misclassification rates (FN+FP)
