# Supplementary material for: Influence of a priori Information, Designs, and Undetectable Data on Individual Parameters Estimation and Prediction of Hepatitis C Treatment Outcome
Source: PubMed Central journal article supplement — CPT Pharmacometrics Syst Pharmacol. 2013 Jul 17;2(7):e56–. doi: 10.1038/psp.2013.31 (PMC3731824; doi:10.1038/psp.2013.31), 2013-07-17
Supplement: psp201331x3.pdf [file psp201331x3.pdf]

### Supplementary materials 3

Table S3. Treatment outcome prediction for a 24-week treatment for different scenarios <sup>(\*)</sup>

| <b><i>A priori information</i></b>               | <b><i>Designs</i></b>                  | <b><i>Method</i></b> | <b>MC</b> | <b>TN</b> | <b>FP</b> | <b>FN</b> | <b>TP</b> |
|--------------------------------------------------|----------------------------------------|----------------------|-----------|-----------|-----------|-----------|-----------|
| <b><i>M<sub>true</sub></i></b>                   | <b><i>D<sub>4w</sub></i></b>           | <b><i>LBA</i></b>    | 13.2      | 36.8      | 9.6       | 3.6       | 50.0      |
|                                                  |                                        | <b><i>OMIT</i></b>   | 14.3      | 38.1      | 8.3       | 6.0       | 47.6      |
|                                                  | <b><i>D<sub>4w_sparse</sub></i></b>    | <b><i>LBA</i></b>    | 16.4      | 34.1      | 12.3      | 4.1       | 49.5      |
|                                                  |                                        | <b><i>OMIT</i></b>   | 16.8      | 35.8      | 10.6      | 6.2       | 47.4      |
|                                                  | <b><i>D<sub>4w_challenge</sub></i></b> | <b><i>LBA</i></b>    | 19.5      | 33.7      | 12.7      | 6.8       | 46.8      |
|                                                  |                                        | <b><i>OMIT</i></b>   | 19.5      | 33.7      | 12.7      | 6.8       | 46.8      |
| <b><i>M<sub>δ<math>\epsilon</math></sub></i></b> | <b><i>D<sub>4w</sub></i></b>           | <b><i>LBA</i></b>    | 14.6      | 40.3      | 6.1       | 8.5       | 45.1      |
|                                                  |                                        | <b><i>OMIT</i></b>   | 23.1      | 41.8      | 4.6       | 18.5      | 35.1      |
|                                                  | <b><i>D<sub>4w_sparse</sub></i></b>    | <b><i>LBA</i></b>    | 19.2      | 41.0      | 5.4       | 13.8      | 39.8      |
|                                                  |                                        | <b><i>OMIT</i></b>   | 40.1      | 42.8      | 3.6       | 36.5      | 17.1      |
|                                                  | <b><i>D<sub>4w_challenge</sub></i></b> | <b><i>LBA</i></b>    | 53.4      | 46.3      | 0.1       | 53.3      | 0.3       |
|                                                  |                                        | <b><i>OMIT</i></b>   | 53.4      | 46.3      | 0.1       | 53.3      | 0.3       |

<sup>(\*)</sup> obtained using different sets of *a priori* information, of designs and of methods for handling BDL data. Treatment response is predicted for a 12-week treatment. TN: percentage of uncured patients predicted to remain infected, FP: percentage of uncured patients predicted to have SVR, FN: percentage of patients having SVR predicted to remain infected, TP: percentage of cured patients predicted to have SVR. MC: percentage of misclassification rates (FN+FP)
