# Supplementary material for: Influence of a priori Information, Designs, and Undetectable Data on Individual Parameters Estimation and Prediction of Hepatitis C Treatment Outcome
Source: PubMed Central journal article supplement — CPT Pharmacometrics Syst Pharmacol. 2013 Jul 17;2(7):e56–. doi: 10.1038/psp.2013.31 (PMC3731824; doi:10.1038/psp.2013.31), 2013-07-17
Supplement: psp201331x5.pdf [file psp201331x5.pdf]

## Supplementarymaterials5

### MONOLIX code for parameter estimation

DESCRIPTION: MONOLIX code

INPUT:

parameter = {r, beta, delta, c, epsilon}

EQUATION:

odeType = stiff

```
;;;;;;;;;;;;;  
; compute the initial values
```

t0 = 0

TCmax = 1.3e7

s = 60000

d = 0.001

p = 50

TC\_0 = delta\*c/beta/p

IC\_0 = (s+r\*TC\_0\*(1-TC\_0/TCmax)-d\*TC\_0)/(r\*TC\_0/TCmax+delta)

VL\_0 = p\*IC\_0/c

```
; proliferation rate of the cells
```

r\_prolif = r\*(1-(TC+IC)/TCmax)

```
; ODE system
```

ddt\_TC = s + r\_prolif\*TC - d\*TC - beta\*TC\*VL

ddt\_IC = beta\*TC\*VL - delta\*IC

ddt\_VL = (1-epsilon)\*p\*IC - c\*VL

OUTPUT:

output = VL
